# Supplementary material for: CX3CR1 identifies PD-1 therapy–responsive CD8+ T cells that withstand chemotherapy during cancer chemoimmunotherapy
Source: JCI journal article supplement (doi:10.1172/jci.insight.97828), 2018-04-18
Supplement: sd1 [file 1]

Supplemental Fig. 1.

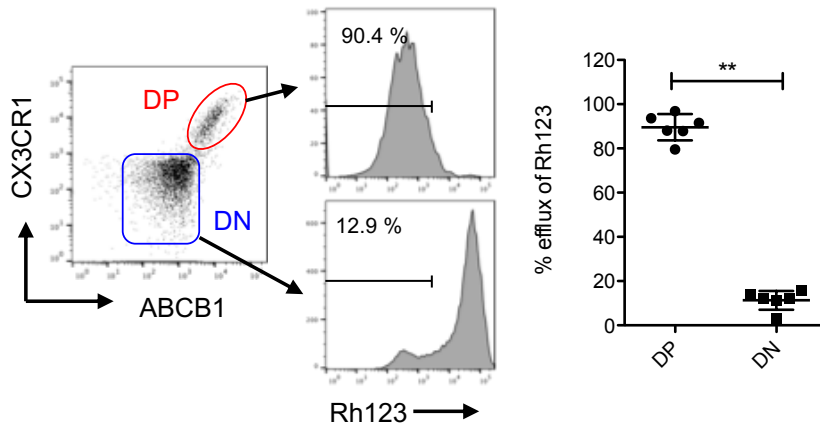

**Supplemental Fig. 1. CX3CR1<sup>+</sup> CD8<sup>+</sup> T cells express ABCB1 and have efflux function.** Human peripheral blood CD8<sup>+</sup> T cells were loaded with 10  $\mu$ g/ml of Rh123 on ice for 30 min and then washed with PBS and incubated for another 30 min at 37<sup>o</sup> C. T cell expression of ABCB1/CX3CR1 and efflux of Rh123 were analyzed by flow cytometry. Percentage of efflux of Rh123 was higher in ABCB1<sup>+</sup> CX3CR1<sup>+</sup> T cells than in ABCB1<sup>-</sup> CX3CR1<sup>-</sup> T cells. DP: double positive; DN: double negative. \*\*P<0.01 (Mann-Whitney U test Two-tailed, n=6).
